# Supplementary material
Source: PubMed Central journal article supplement (PMC3934600)
Supplement: Supp_Fig2.pdf [file Supp_Fig2.pdf]

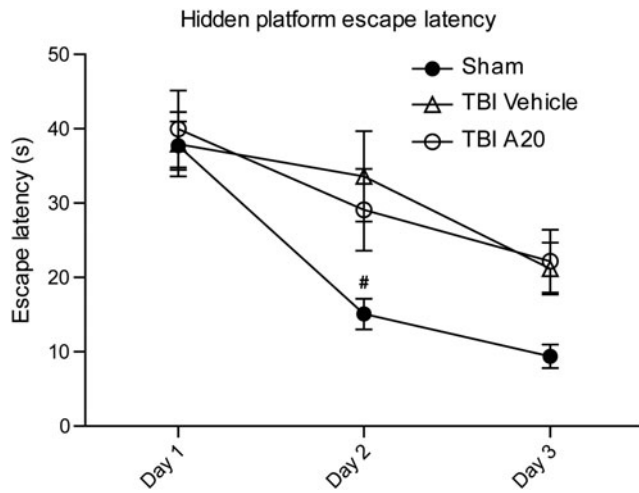

**SUPPLEMENTARY FIG. 2.** There was no difference in hidden platform escape latencies between TBI-vehicle- and TBI-A20-treated groups 2 weeks post-TBI. Separate groups of animals were tested for spatial memory capacity at 2 weeks postinjury or sham surgery. On day 2, there was a significant difference in hidden platform escape latencies between sham and TBI-vehicle groups (Bonferroni's multiple comparison test:  $^{\#}p < 0.05$ ); however, there were no differences between TBI-vehicle and TBI-A20 groups on any trial day at a 2-week time point (two-way repeated-measures ANOVA: trial day,  $p < 0.0001$ ; treatment,  $p = 0.026$ ; treatment  $\times$  trial day interaction, 0.134; Bonferroni's post hoc: TBI-vehicle vs. TBI-A20, not significant). This finding is consistent with established neuronal maturation patterns and functionality during normal development stages;  $n = 27$ . TBI, traumatic brain injury; ANOVA, analysis of variance.
