# Supplementary material
Source: PubMed Central journal article supplement (PMC3934600)
Supplement: Supp_Table1.pdf [file Supp_Table1.pdf]

SUPPLEMENTARY TABLE 1. PHYSIOLOGICAL PARAMETERS<sup>a</sup>

|                    | <i>Sham-vehicle</i> | <i>Sham-A20</i> | <i>TBI-vehicle</i> | <i>TBI A20</i> |
|--------------------|---------------------|-----------------|--------------------|----------------|
| 15 min pretrauma   |                     |                 |                    |                |
| pH                 | 7.41 ± 0.01         | 7.43 ± 0.01     | 7.40 ± 0.01        | 7.41 ± 0.01    |
| pCO <sub>2</sub>   | 40.5 ± 0.34         | 41.68 ± 0.96    | 42.09 ± 0.85       | 39.83 ± 0.72   |
| pO <sub>2</sub>    | 144 ± 8.65          | 156.2 ± 13.09   | 162.3 ± 6.42       | 155 ± 9.86     |
| MABP               | 132 ± 2.47          | 128.16 ± 3.40   | 123.46 ± 2.72      | 123.9 ± 3.23   |
| Brain temperature  | 36.8 ± 0.26         | 36.96 ± 0.13    | 36.81 ± 0.08       | 37.12 ± 0.07   |
| Rectal temperature | 36.8 ± 0.31         | 36.88 ± 0.10    | 36.88 ± 0.11       | 36.93 ± 0.10   |
| 15 min post-trauma |                     |                 |                    |                |
| pH                 | 7.43 ± 0.01         | 7.45 ± 0.01     | 7.44 ± 0.01        | 7.43 ± 0.01    |
| pCO <sub>2</sub>   | 39.0 ± 0.98         | 37.96 ± 0.31    | 38.45 ± 0.63       | 38.22 ± 0.62   |
| pO <sub>2</sub>    | 141.2 ± 13.09       | 154.8 ± 10.93   | 148.50 ± 9.81      | 139.8 ± 5.49   |
| MABP               | 130.4 ± 2.69        | 126.6 ± 2.36    | 107.15 ± 2.17      | 115.8 ± 3.72   |
| Brain temperature  | 36.74 ± 0.20        | 36.86 ± 0.10    | 36.89 ± 0.09       | 36.76 ± 0.12   |
| Rectal temperature | 36.72 ± 0.12        | 37.02 ± 0.08    | 36.87 ± 0.07       | 36.83 ± 0.07   |
| 30 min post-trauma |                     |                 |                    |                |
| pH                 | 7.44 ± 0.01         | 7.44 ± 0.01     | 7.44 ± 0.01        | 7.43 ± 0.01    |
| pCO <sub>2</sub>   | 39.2 ± 0.98         | 39.38 ± 0.38    | 38.7 ± 0.80        | 38.17 ± 0.48   |
| pO <sub>2</sub>    | 141.2 ± 9.89        | 152.2 ± 14.87   | 138.3 ± 7.70       | 139.8 ± 6.81   |
| MABP               | 126.8 ± 3.61        | 123.52 ± 3.88   | 104.14 ± 3.77      | 118.9 ± 4.04   |
| Brain temperature  | 36.98 ± 0.02        | 36.84 ± 0.08    | 36.94 ± 0.05       | 36.95 ± 0.07   |
| Rectal temperature | 37.02 ± 0.05        | 36.78 ± 0.15    | 36.88 ± 0.07       | 36.97 ± 0.09   |

All physiological variables were within normal ranges before and after TBI.

<sup>a</sup>Mean ± standard error of the mean.

MABP, mean arterial blood pressure; TBI, traumatic brain injury.
