# Supplementary material
Source: PubMed Central journal article supplement (PMC3934600)

## Supplementary Data

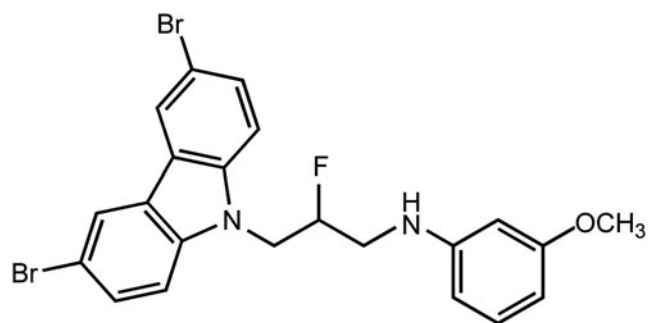

**SUPPLEMENTARY FIG. 1.** Chemical structure of P7C3-A20.

Supplement: Supp_Fig1.pdf [file Supp_Fig1.pdf]
